# Supplementary material
Source: publisher figshare collection journal article supplement (https://future-science-group.figshare.com/ndownloader/files/30909406)
Supplement: Supplementary file 1 [file 30909406]

**Table S1. The 41 ferroptosis genes.**

| Ferroptosis Genes | ALOX15  HMOX1  FTH1  speG  ACSL  TP53  GPX4  PRNP  PrP  CD230  TFRC  CD71  SLC3A2  MDU1  CD98  ATG7  ATG5  NCOA4  STEAP3  MAP1LC  GCLC  GCLM  PCBP1  PCBP2  LPCAT3  MBOAT5  CP  FTL  SLC7A11  SLC40A1  SLC39A8  SLC39A14  TF  VDAC2  VDAC3  FTMT  SLC11A2  DMT1  NRAMP2  NOX2  GP91  CYBB  GSS |
| --- | --- |
